# Supplementary material for: Olive Leaf Extract, from Olea europaea L., Reduces Palmitate-Induced Inflammation via Regulation of Murine Macrophages Polarization
Source: MDPI journal article supplement (doi:10.3390/nu12123663), 2020-11-28
Supplement: s1 [file s1]

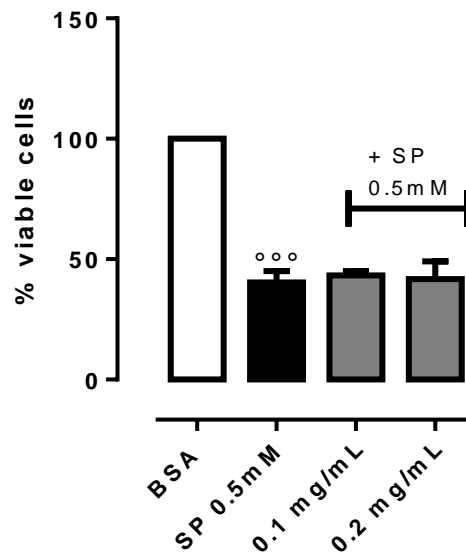

**Figure S1.** Effect of sodium palmitate (SP) on macrophages viability. The effect of SP (0.5mM) with or without Olive Leaf Extract (OLE) (0.1-0.2 mg/mL) on the viability of RAW 264.7 macrophages was measured by 3-(4,3-(4,5-dimethylthiazol-2-yl)-2,5 diphenyltetrazolium bromide 5-dimethylthiazol-2-yl)-2, 5-diphenyltetrazolium bromide (MTT) assay. Values are express as mean  $\pm$  standard error of mean (SEM) from three independent experiments. <sup>\*\*\*</sup>  $p < 0.001$  indicate significant effect of SP compared with vehicle-treated cells.

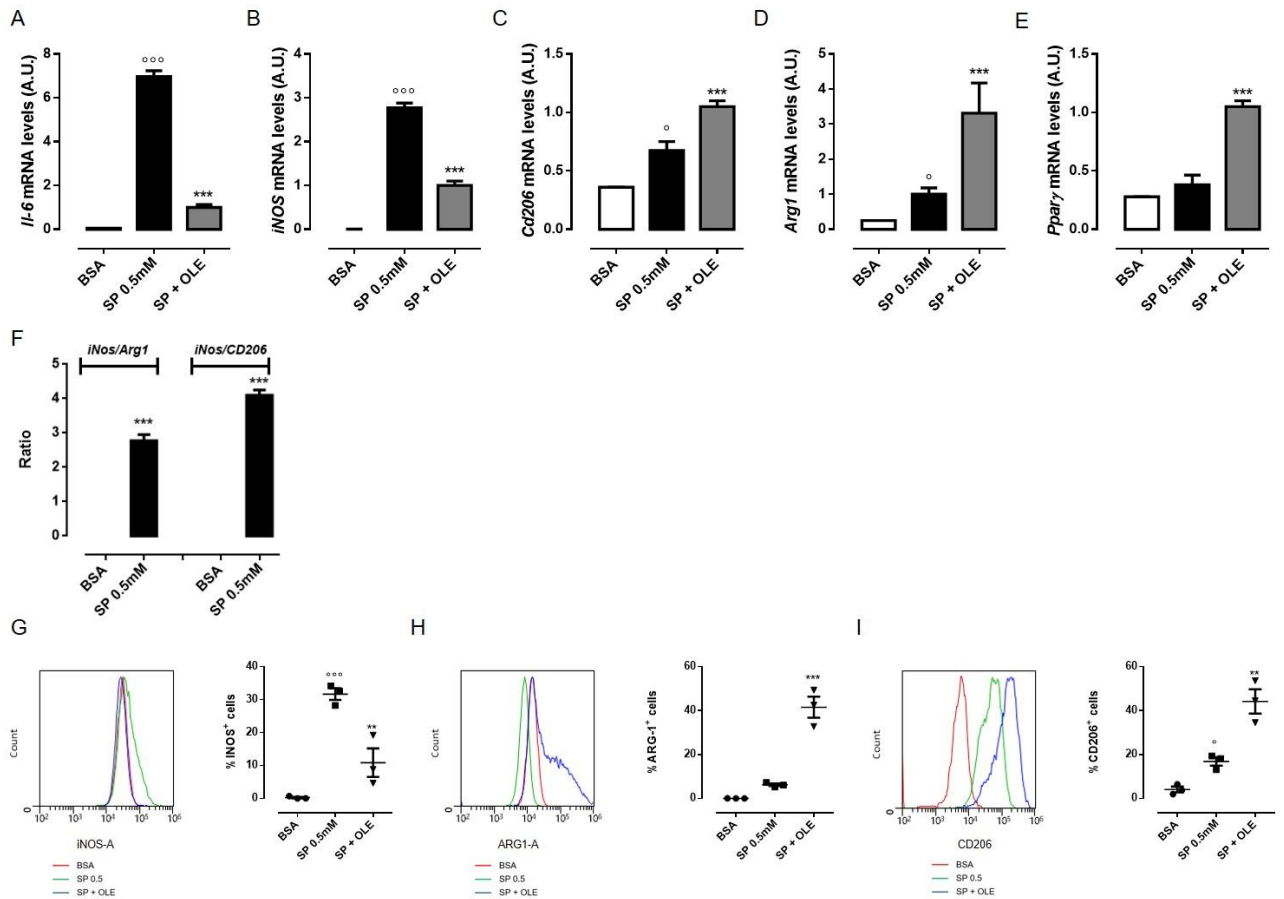

**Figure S2.** Olive Leaf Extract (OLE) drives murine bone marrow-derived macrophages (BMDMs) Table 2. polarization. Bone marrow cells were differentiated to macrophages for 7 days. On day 7<sup>th</sup> BMDMs were treated with OLE (0.2 mg/mL) for 30 min before to be stimulated with sodium palmitate (SP) 0.5 mM. (A-E) Relative mRNA levels of *interleukin (Il)-6*, *inducible nitric oxide synthase (iNos)*, *mannose receptor C type 1 (CD206)*, *arginase-1 (Arg-1)* and *peroxisome proliferator-activated receptor gamma (Ppar $\gamma$ )* were determined by Real Time-PCR (RT-PCR). (F) Ratio of mRNA levels of *iNos* versus *Arg-1* and *Cd206*. (G-I) Flow cytometric analysis of iNOS, ARG1 and CD206 expression and relative quantitative analysis in BMDMs after 24 h. Values are express as mean  $\pm$  standard error of mean (SEM) from three independent experiments. <sup>o</sup>  $p < 0.05$ , <sup>ooo</sup>  $p < 0.001$  indicate significant effect of SP compared with vehicle-treated cells; \*\*  $p < 0.01$ , \*\*\*  $p < 0.001$  indicate significant effect of OLE compared with SP-stimulated cells.
